# Supplementary material for: Contrasting vertical distributions of recent planktic foraminifera off Indonesia during the southeast monsoon: implications for paleoceanographic reconstructions
Source: Copernicus journal article supplement (doi:10.5194/bg-19-3185-2022), 2022-07-07
Supplement: Supplementary file 1 [file bg-19-3185-2022-supplement.zip]

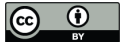

*Supplement of*

## **Contrasting vertical distributions of recent planktic foraminifera off Indonesia during the southeast monsoon: implications for paleoceanographic reconstructions**

**Raúl Tapia et al.**

*Correspondence to:* Raúl Tapia ([raultapia@ntu.edu.tw](mailto:raultapia@ntu.edu.tw)) and Sze Ling Ho ([slingho@ntu.edu.tw](mailto:slingho@ntu.edu.tw))

- [bg-19-3185-2022-supplement-title-page.pdf](#)
- [Planktic\\_Foraminifera\\_off\\_Indonesia\\_Tapia\\_et\\_al\\_submitted.xlsx](#)

The copyright of individual parts of the supplement might differ from the article licence.
