# Supplementary material for: Contrasting vertical distributions of recent planktic foraminifera off Indonesia during the southeast monsoon: implications for paleoceanographic reconstructions
Source: Copernicus journal article supplement (doi:10.5194/bg-19-3185-2022), 2022-07-07
Supplement: Supplementary file 1 [file Planktic_Foraminifera_off_Indonesia_Tapia_et_al_submitted.xlsx]

## Sheet: 01
Site	Station	Latitude	Longitude	Depth water [m]	Date	Time (UTC)	Depth top [m]	Depth bot [m]	Vol [m^3]	T. trilobus [#]	T. sacculifer [#]	G. ruber (white) [#]	G. elongatus [#]	N. dutertrei [#]	G. mernardii [#]	P.obliquiloculata [#]	G. bulloides [#]	G. glutinata [#]	G. calida [#]	G. siphonifera [#]	S. dehiscens [#]	O. universa [#]	G. inflata [#]	N. incompta [#]	N. pachyderma [#]	G. hexagonus [#]	G. hirsuta [#]	G. falconensis [#]	G. tumida [#]	G. digitata [#]	G. scitula [#]	G. tenellus [#]	G. rubescens [#]	G. conglobatus [#]	G. uvula [#]	G. truncatulinoides [#]	T. humilis [#]	G. adamsi [#]	Total Planktic Foraminifera [#]	T. trilobus [# / m^3]	T. sacculifer [# / m^3]	G. ruber (white) [ # / m^3]	G. elongatus [# / m^3]	N. dutertrei [# / m^3]	G. mernardii [# / m^3]	P.obliquiloculata [# / m^3]	G. bulloides [# / m^3]	G. glutinata [# / m^3]	G. calida [# / m^3]
GeoB	10018	1.5703	96.5122	2577	08.08.05	16:33:00	0	25	6.25	4	0	1	1	0	0	0	1	1	0	1	0	0	0	0	1	0	0	0	0	0	0	0	0	0	0	0	0	0	10	0.64	0	0.16	0.16	0	0	0	0.16	0.16	0
GeoB	10018	1.5703	96.5122	2578	08.08.06	17:33:00	25	50	6.25	1	0	0	0	0	0	0	0	1	1	1	0	0	0	0	0	0	0	1	0	0	0	0	0	0	0	0	0	0	5	0.16	0	0	0	0	0	0	0	0.16	0.16
GeoB	10018	1.5703	96.5122	2579	08.08.07	18:33:00	50	100	12.5	1	0	0	3	0	0	0	2	1	1	0	0	0	0	0	0	0	0	1	0	0	0	0	0	0	0	0	0	0	9	0.08	0	0	0.24	0	0	0	0.16	0.08	0.08
GeoB	10018	1.5703	96.5122	2580	08.08.08	19:33:00	100	200	25	1	0	2	1	0	0	0	1	2	0	2	0	0	0	1	1	0	0	0	0	1	0	0	0	0	0	0	0	0	12	0.04	0	0.08	0.04	0	0	0	0.04	0.08	0
GeoB	10018	1.5703	96.5122	2581	08.08.09	20:33:00	200	500	75	2	0	8	4	1	0	0	0	0	2	2	0	0	0	4	1	0	1	1	0	0	0	0	0	0	0	0	0	0	26	0.0266667	0	0.106667	0.0533333	0.0133333	0	0	0	0	0.0266667
GeoB	10019	1.6322	96.8852	1465	08.08.05	21:48:00	0	25	6.25	1	0	4	0	0	0	0	1	0	0	0	0	0	0	0	0	0	0	1	0	0	0	0	0	0	0	0	0	0	7	0.16	0	0.64	0	0	0	0	0.16	0	0
GeoB	10019	1.6322	96.8852	1466	08.08.06	22:48:00	25	50	6.25	4	0	3	0	0	0	0	4	1	1	0	0	0	0	3	0	0	0	0	0	0	0	0	1	0	0	0	0	0	17	0.64	0	0.48	0	0	0	0	0.64	0.16	0.16
GeoB	10019	1.6322	96.8852	1467	08.08.07	23:48:00	50	100	12.5	0	0	2	0	0	0	0	3	0	3	0	0	0	0	3	0	0	0	0	0	0	0	0	0	0	0	0	0	0	11	0	0	0.16	0	0	0	0	0.24	0	0.24
GeoB	10019	1.6322	96.8852	1468	08.08.08	1900-01-01 00:48:00	100	200	25	0	0	0	0	0	0	0	0	0	0	0	0	0	0	0	0	0	1	0	0	0	0	0	0	0	0	0	0	0	1	0	0	0	0	0	0	0	0	0	0
GeoB	10019	1.6322	96.8852	1469	08.08.09	1900-01-01 01:48:00	200	500	75	0	0	8	2	0	0	0	2	4	13	2	0	1	0	2	0	0	1	3	0	0	0	0	1	0	0	0	0	0	39	0	0	0.106667	0.0266667	0	0	0	0.0266667	0.0533333	0.173333
GeoB	10020	1.6782	96.9795	1160	09.08.05	01:09:00	0	25	6.25	5	0	1	0	0	0	0	0	0	0	1	0	0	0	0	0	0	0	0	0	0	0	0	0	0	0	0	0	0	7	0.8	0	0.16	0	0	0	0	0	0	0
GeoB	10020	1.6782	96.9795	1161	09.08.06	02:09:00	25	50	6.25	1	0	0	0	0	0	0	0	0	0	0	0	0	0	0	0	0	0	0	0	0	0	0	0	0	0	0	0	0	1	0.16	0	0	0	0	0	0	0	0	0
GeoB	10020	1.6782	96.9795	1162	09.08.07	03:09:00	50	100	12.5	0	0	9	3	1	0	1	0	0	4	0	0	0	4	0	0	0	0	0	0	0	0	0	0	0	0	0	0	0	22	0	0	0.72	0.24	0.08	0	0.08	0	0	0.32
GeoB	10020	1.6782	96.9795	1163	09.08.08	04:09:00	100	200	25	0	0	1	0	0	0	2	1	1	4	0	0	0	0	1	0	0	0	0	0	0	1	0	0	0	0	0	0	0	11	0	0	0.04	0	0	0	0.08	0.04	0.04	0.16
GeoB	10020	1.6782	96.9795	1164	09.08.09	05:09:00	200	500	75	1	2	3	0	1	0	0	5	6	8	0	0	0	0	1	0	0	0	1	0	0	0	4	0	0	0	0	0	0	32	0.0133333	0.0266667	0.04	0	0.0133333	0	0	0.0666667	0.08	0.106667
GeoB	10011	-1.1905	97.9855	3030	06.08.05	15:01:00	0	25	6.25	12	0	4	0	0	0	0	0	1	7	3	0	0	0	0	0	0	0	1	0	0	0	1	0	0	0	0	0	0	29	1.92	0	0.64	0	0	0	0	0	0.16	1.12
GeoB	10011	-1.1905	97.9855	3031	06.08.06	16:01:00	25	50	6.25	5	0	1	2	1	0	0	0	0	3	1	0	0	0	0	0	0	0	0	0	0	0	0	0	0	0	0	0	0	13	0.8	0	0.16	0.32	0.16	0	0	0	0	0.48
GeoB	10011	-1.1905	97.9855	3032	06.08.07	17:01:00	50	100	12.5	2	0	3	2	0	0	0	2	0	0	0	0	0	0	0	0	0	0	3	0	0	0	0	0	0	0	0	0	0	12	0.16	0	0.24	0.16	0	0	0	0.16	0	0
GeoB	10011	-1.1905	97.9855	3033	06.08.08	18:01:00	100	200	25	1	0	3	0	0	0	0	0	1	0	0	0	0	0	0	0	0	0	0	0	0	1	0	0	0	0	0	0	0	6	0.04	0	0.12	0	0	0	0	0	0.04	0
GeoB	10011	-1.1905	97.9855	3034	06.08.09	19:01:00	200	500	75	0	0	0	3	0	0	0	0	2	1	0	0	0	0	1	0	0	0	0	0	0	0	1	0	0	0	0	0	0	8	0	0	0	0.04	0	0	0	0	0.0266667	0.0133333
GeoB	10022	-0.0513	98.8497	707	10.08.05	10:13:00	0	25	6.25	1	0	2	0	1	0	0	0	0	0	0	0	0	0	0	0	0	0	0	0	0	0	0	0	0	0	0	0	0	4	0.16	0	0.32	0	0.16	0	0	0	0	0
GeoB	10022	-0.0513	98.8497	708	10.08.06	11:13:00	25	50	6.25	5	0	3	0	0	0	0	0	1	1	0	0	0	1	0	0	2	0	0	0	0	0	0	0	0	0	0	0	0	13	0.8	0	0.48	0	0	0	0	0	0.16	0.16
GeoB	10022	-0.0513	98.8497	709	10.08.07	12:13:00	50	100	12.5	2	0	1	0	0	0	0	0	1	1	0	0	0	0	0	0	1	0	0	0	0	0	0	0	0	0	0	0	0	6	0.16	0	0.08	0	0	0	0	0	0.08	0.08
GeoB	10022	-0.0513	98.8497	710	10.08.08	13:13:00	100	200	25	0	0	0	0	0	0	0	0	0	0	0	0	0	0	0	0	0	0	0	0	0	0	0	0	0	0	0	0	0	0	0	0	0	0	0	0	0	0	0	0
GeoB	10022	-0.0513	98.8497	711	10.08.09	14:13:00	200	500	75	2	0	8	1	0	0	0	1	1	1	2	0	0	0	0	0	7	0	0	0	0	0	0	0	0	0	0	0	0	23	0.0266667	0	0.106667	0.0133333	0	0	0	0.0133333	0.0133333	0.0133333
GeoB	10023	-0.857	99.4073	1557	11.08.05	00:57:00	0	25	6.25	0	0	1	0	0	0	0	1	0	0	0	0	0	0	0	0	0	0	0	0	0	0	0	0	0	0	0	0	0	2	0	0	0.16	0	0	0	0	0.16	0	0
GeoB	10023	-0.857	99.4073	1558	11.08.06	01:57:00	25	50	6.25	5	0	3	0	0	0	0	2	2	0	1	0	0	0	0	0	2	0	0	0	0	0	1	0	0	0	0	0	0	16	0.8	0	0.48	0	0	0	0	0.32	0.32	0
GeoB	10023	-0.857	99.4073	1559	11.08.07	02:57:00	50	100	12.5	0	0	1	0	0	0	0	2	0	0	0	0	0	0	0	0	1	0	0	0	0	0	0	0	0	0	0	0	0	4	0	0	0.08	0	0	0	0	0.16	0	0
GeoB	10023	-0.857	99.4073	1560	11.08.08	03:57:00	100	200	25	0	0	0	0	0	0	0	1	1	0	0	0	0	0	0	0	4	0	1	0	0	0	0	0	0	0	0	0	0	7	0	0	0	0	0	0	0	0.04	0.04	0
GeoB	10023	-0.857	99.4073	1561	11.08.09	04:57:00	200	500	75	0	0	4	2	0	0	0	3	3	0	0	0	0	0	0	0	3	0	4	0	0	1	1	0	0	0	0	1	0	22	0	0	0.0533333	0.0266667	0	0	0	0.04	0.04	0
GeoB	10024	-0.769	99.2687	1384	11.08.05	07:10:00	0	25	6.25	2	0	2	0	0	0	0	1	0	0	0	0	0	0	0	0	2	0	0	0	0	0	0	0	0	0	0	0	0	7	0.32	0	0.32	0	0	0	0	0.16	0	0
GeoB	10024	-0.769	99.2687	1385	11.08.06	08:10:00	25	50	6.25	2	0	0	0	0	0	0	0	1	0	2	0	0	0	0	0	2	0	0	0	0	0	0	0	0	0	0	0	0	7	0.32	0	0	0	0	0	0	0	0.16	0
GeoB	10024	-0.769	99.2687	1386	11.08.07	09:10:00	50	100	12.5	1	0	2	0	0	0	0	2	2	0	0	0	0	0	0	0	1	0	0	0	0	0	0	0	0	0	0	0	0	8	0.08	0	0.16	0	0	0	0	0.16	0.16	0
GeoB	10024	-0.769	99.2687	1387	11.08.08	10:10:00	100	200	25	0	0	1	0	0	0	0	0	1	0	0	0	0	0	0	0	7	0	0	0	0	0	0	0	0	0	0	0	0	9	0	0	0.04	0	0	0	0	0	0.04	0
GeoB	10024	-0.769	99.2687	1388	11.08.09	11:10:00	200	500	75	1	1	0	1	0	0	0	0	0	0	1	0	0	0	0	0	0	0	0	0	0	0	0	0	0	0	0	0	0	4	0.0133333	0.0133333	0	0.0133333	0	0	0	0	0	0
GeoB	10025	-0.675	99.1232	1389	11.08.10	12:10:00	0	25	6.25	12	0	10	0	0	0	0	0	4	1	0	0	0	0	0	0	1	0	0	0	0	0	0	0	0	0	0	0	0	28	1.92	0	1.6	0	0	0	0	0	0.64	0.16
GeoB	10025	-0.675	99.1232	1148	11.08.05	12:33:00	25	50	6.25	0	0	0	0	0	0	0	0	0	0	0	0	0	0	0	0	0	0	0	0	0	0	0	0	0	0	0	0	0	0	0	0	0	0	0	0	0	0	0	0
GeoB	10025	-0.675	99.1232	1149	11.08.06	13:33:00	50	100	12.5	6	1	5	1	0	0	0	0	0	1	0	0	0	0	0	0	2	0	0	0	0	0	0	0	0	0	0	0	0	16	0.48	0.08	0.4	0.08	0	0	0	0	0	0.08
GeoB	10025	-0.675	99.1232	1150	11.08.07	14:33:00	100	200	25	1	0	5	0	0	0	0	0	1	0	1	0	0	0	0	0	1	0	0	0	0	0	0	0	0	0	0	0	0	9	0.04	0	0.2	0	0	0	0	0	0.04	0
GeoB	10025	-0.675	99.1232	1151	11.08.08	15:33:00	200	500	75	3	0	11	2	2	0	0	5	3	4	2	0	0	0	0	0	7	0	1	0	0	6	1	1	0	0	0	0	0	48	0.04	0	0.146667	0.0266667	0.0266667	0	0	0.0666667	0.04	0.0533333
GeoB	10026	-0.9442	99.5213	1636	12.08.05	01:20:00	0	25	6.25	7	0	0	1	0	0	0	0	0	0	0	0	0	0	0	0	0	0	0	0	0	0	0	0	0	0	0	0	0	8	1.12	0	0	0.16	0	0	0	0	0	0
GeoB	10026	-0.9442	99.5213	1637	12.08.06	02:20:00	25	50	6.25	1	0	0	0	0	0	0	0	0	0	0	0	0	0	1	0	0	0	1	0	0	0	0	0	0	0	0	0	0	3	0.16	0	0	0	0	0	0	0	0	0
GeoB	10026	-0.9442	99.5213	1638	12.08.07	03:20:00	50	100	12.5	1	0	0	0	0	0	0	0	0	0	0	0	0	0	2	0	0	0	0	0	0	0	0	0	0	0	0	0	0	3	0.08	0	0	0	0	0	0	0	0	0
GeoB	10026	-0.9442	99.5213	1639	12.08.08	04:20:00	100	200	25	0	0	0	1	0	0	0	2	0	0	0	0	0	0	0	0	0	0	1	0	0	0	0	0	0	0	0	2	0	6	0	0	0	0.04	0	0	0	0.08	0	0
GeoB	10026	-0.9442	99.5213	1640	12.08.09	05:20:00	200	500	75	2	1	0	0	0	0	0	2	2	1	0	0	0	0	0	0	7	0	0	0	0	1	0	0	0	0	0	0	0	16	0.0266667	0.0133333	0	0	0	0	0	0.0266667	0.0266667	0.0133333
GeoB	10027	-0.8088	99.6533	876	12.08.05	07:43:00	0	25	6.25	1	1	0	0	0	0	0	6	2	1	0	0	0	0	0	0	0	0	2	0	0	0	0	0	0	0	0	0	0	13	0.16	0.16	0	0	0	0	0	0.96	0.32	0.16
GeoB	10027	-0.8088	99.6533	877	12.08.06	08:43:00	25	50	6.25	2	1	2	0	0	0	0	0	0	0	0	0	0	0	1	0	0	0	0	0	0	0	0	0	0	0	0	0	0	6	0.32	0.16	0.32	0	0	0	0	0	0	0
GeoB	10027	-0.8088	99.6533	878	12.08.07	09:43:00	50	100	12.5	0	0	0	0	0	0	0	0	0	0	0	0	2	0	0	0	0	0	0	0	0	0	0	0	0	0	0	0	0	2	0	0	0	0	0	0	0	0	0	0
GeoB	10027	-0.8088	99.6533	879	12.08.08	10:43:00	100	200	25	0	0	1	0	0	0	0	0	0	0	0	0	0	0	0	0	1	0	0	0	0	0	0	0	0	0	0	0	0	2	0	0	0.04	0	0	0	0	0	0	0
GeoB	10027	-0.8088	99.6533	880	12.08.09	11:43:00	200	500	75	10	5	7	4	2	0	0	9	15	6	4	0	1	0	1	0	5	0	0	0	0	3	3	0	0	0	0	0	1	76	0.133333	0.0666667	0.0933333	0.0533333	0.0266667	0	0	0.12	0.2	0.08
GeoB	10028	-0.6962	99.7628	521	12.08.05	11:58:00	0	25	6.25	12	1	3	0	0	0	0	3	1	0	2	0	0	0	0	0	1	0	0	0	0	0	0	0	0	0	0	0	0	23	1.92	0.16	0.48	0	0	0	0	0.48	0.16	0
GeoB	10028	-0.6962	99.7628	522	12.08.06	12:58:00	25	50	6.25	4	4	2	0	0	0	0	0	0	1	0	0	0	0	0	0	1	0	0	0	0	0	0	0	0	0	0	0	0	12	0.64	0.64	0.32	0	0	0	0	0	0	0.16
GeoB	10028	-0.6962	99.7628	523	12.08.07	13:58:00	50	100	12.5	1	0	3	0	2	0	0	0	5	0	2	0	0	0	0	0	1	0	0	0	0	0	0	0	0	0	0	0	0	14	0.08	0	0.24	0	0.16	0	0	0	0.4	0
GeoB	10028	-0.6962	99.7628	524	12.08.08	14:58:00	100	200	25	1	0	2	0	0	0	0	1	1	1	0	0	0	0	0	0	7	0	0	0	0	0	1	0	0	0	0	0	0	14	0.04	0	0.08	0	0	0	0	0.04	0.04	0.04
GeoB	10028	-0.6962	99.7628	525	12.08.09	15:58:00	200	500	75	1	1	0	0	0	0	0	3	0	0	1	0	0	0	0	0	1	0	0	0	0	0	0	0	0	0	0	0	0	7	0.0133333	0.0133333	0	0	0	0	0	0.04	0	0
GeoB	10007	-4.3543	100.996	598	04.08.05	15:30:00	0	25	6.25	10	0	9	0	0	0	0	1	0	0	1	0	0	0	1	0	0	0	0	0	0	0	0	0	0	0	0	0	0	22	1.6	0	1.44	0	0	0	0	0.16	0	0
GeoB	10007	-4.3543	100.996	599	04.08.06	16:30:00	25	50	6.25	14	1	1	0	0	0	0	1	1	3	1	0	0	0	2	0	5	0	0	0	0	0	0	0	0	0	0	0	0	29	2.24	0.16	0.16	0	0	0	0	0.16	0.16	0.48
GeoB	10007	-4.3543	100.996	600	04.08.07	17:30:00	50	100	12.5	14	3	1	0	0	0	0	1	0	0	1	0	0	0	1	0	0	0	0	0	0	0	1	0	0	0	0	0	0	22	1.12	0.24	0.08	0	0	0	0	0.08	0	0
GeoB	10007	-4.3543	100.996	601	04.08.08	18:30:00	100	200	25	2	4	1	0	0	0	0	2	1	2	0	16	0	0	3	0	5	0	0	0	0	0	0	0	0	0	0	0	0	36	0.08	0.16	0.04	0	0	0	0	0.08	0.04	0.08
GeoB	10007	-4.3543	100.996	602	04.08.09	19:30:00	200	500	75	9	0	37	6	0	0	0	3	8	12	0	0	0	0	5	2	11	0	1	0	0	1	7	1	0	0	0	0	1	104	0.12	0	0.493333	0.08	0	0	0	0.04	0.106667	0.16
GeoB	10034	-4.1652	101.499	992	15.08.05	05:45:00	0	25	6.25	14	1	11	0	0	1	0	2	5	10	0	0	0	0	2	0	1	0	1	0	0	0	0	0	0	0	0	0	0	48	2.24	0.16	1.76	0	0	0.16	0	0.32	0.8	1.6
GeoB	10034	-4.1652	101.499	993	15.08.06	06:45:00	25	50	6.25	0	0	0	1	0	0	0	0	0	0	0	0	0	0	0	0	0	0	0	0	0	0	0	0	0	0	0	0	0	1	0	0	0	0.16	0	0	0	0	0	0
GeoB	10034	-4.1652	101.499	994	15.08.07	07:45:00	50	100	12.5	3	0	3	0	1	0	0	3	4	5	3	0	0	0	2	0	1	0	1	0	0	0	1	0	0	0	0	0	1	28	0.24	0	0.24	0	0.08	0	0	0.24	0.32	0.4
GeoB	10034	-4.1652	101.499	995	15.08.08	08:45:00	100	200	25	0	0	3	0	0	0	0	2	1	3	0	0	0	0	0	0	4	4	0	0	0	0	0	0	0	0	0	0	4	21	0	0	0.12	0	0	0	0	0.08	0.04	0.12
GeoB	10034	-4.1652	101.499	996	15.08.09	09:45:00	200	500	75	3	1	22	8	4	0	0	7	11	12	6	0	1	0	2	0	0	0	1	0	0	0	0	1	0	0	0	0	0	79	0.04	0.0133333	0.293333	0.106667	0.0533333	0	0	0.0933333	0.146667	0.16
GeoB	10035	-4.0363	101.733	997	15.08.05	11:49:00	0	25	6.25	13	0	1	0	0	0	0	3	2	7	1	0	0	0	0	0	0	0	1	0	0	0	0	0	0	0	0	0	0	28	2.08	0	0.16	0	0	0	0	0.48	0.32	1.12
GeoB	10035	-4.0363	101.733	998	15.08.06	12:49:00	25	50	6.25	1	0	1	0	1	0	0	2	1	6	0	0	0	0	0	0	0	0	0	0	0	0	0	0	0	0	0	0	0	12	0.16	0	0.16	0	0.16	0	0	0.32	0.16	0.96
GeoB	10035	-4.0363	101.733	999	15.08.07	13:49:00	50	100	12.5	0	1	2	0	5	0	2	2	2	10	5	0	3	1	0	0	0	0	1	0	0	0	0	0	0	0	0	0	0	34	0	0.08	0.16	0	0.4	0	0.16	0.16	0.16	0.8
GeoB	10035	-4.0363	101.733	1000	15.08.08	14:49:00	100	200	25	0	0	1	0	0	1	0	0	2	1	0	0	0	4	0	0	4	0	0	0	0	6	0	0	0	0	0	0	0	19	0	0	0.04	0	0	0.04	0	0	0.08	0.04
GeoB	10035	-4.0363	101.733	1001	15.08.09	15:49:00	200	500	75	1	2	1	4	1	0	3	3	6	3	0	0	0	6	0	0	0	0	0	0	0	1	2	0	0	0	0	0	0	33	0.0133333	0.0266667	0.0133333	0.0533333	0.0133333	0	0.04	0.04	0.08	0.04
GeoB	10036	-5.3377	103.657	1498	16.08.05	05:46:00	0	25	6.25	69	0	7	0	2	4	0	5	5	21	13	0	0	0	0	0	3	0	1	0	0	0	2	0	0	0	0	0	0	132	11.04	0	1.12	0	0.32	0.64	0	0.8	0.8	3.36
GeoB	10036	-5.3377	103.657	1499	16.08.06	06:46:00	25	50	6.25	13	4	3	0	3	2	0	4	2	9	6	0	0	0	0	0	1	0	0	0	0	0	0	0	0	0	0	0	3	50	2.08	0.64	0.48	0	0.48	0.32	0	0.64	0.32	1.44
GeoB	10036	-5.3377	103.657	1500	16.08.07	07:46:00	50	100	12.5	6	0	0	0	4	0	3	3	3	6	7	4	0	2	1	0	0	0	0	0	0	0	0	0	0	0	0	0	2	41	0.48	0	0	0	0.32	0	0.24	0.24	0.24	0.48
GeoB	10036	-5.3377	103.657	1501	16.08.08	08:46:00	100	200	25	2	0	1	0	2	0	0	2	3	5	2	0	0	0	1	0	0	3	0	0	0	0	0	0	0	0	0	0	0	21	0.08	0	0.04	0	0.08	0	0	0.08	0.12	0.2
GeoB	10036	-5.3377	103.657	1502	16.08.09	09:46:00	200	500	75	12	9	9	0	11	4	6	8	11	23	20	0	1	1	2	0	4	3	1	0	6	0	2	1	0	0	0	0	1	135	0.16	0.12	0.12	0	0.146667	0.0533333	0.08	0.106667	0.146667	0.306667
GeoB	10038	-5.9365	103.246	1887	17.08.05	00:22:00	0	25	6.25	6	0	4	0	2	3	0	18	4	13	4	0	0	2	0	0	1	0	4	0	0	0	0	0	0	0	0	0	0	61	0.96	0	0.64	0	0.32	0.48	0	2.88	0.64	2.08
GeoB	10038	-5.9365	103.246	1888	17.08.06	01:22:00	25	50	6.25	12	1	4	0	2	9	2	6	1	3	4	0	0	2	1	1	0	0	0	0	0	0	2	0	0	0	0	0	0	50	1.92	0.16	0.64	0	0.32	1.44	0.32	0.96	0.16	0.48
GeoB	10038	-5.9365	103.246	1889	17.08.07	02:22:00	50	100	12.5	1	0	2	1	6	1	1	2	0	2	6	0	0	0	0	0	0	0	0	0	0	0	0	0	0	0	0	0	0	22	0.08	0	0.16	0.08	0.48	0.08	0.08	0.16	0	0.16
GeoB	10038	-5.9365	103.246	1890	17.08.08	03:22:00	100	200	25	10	1	5	0	3	1	1	21	5	12	12	0	0	2	0	0	0	4	0	0	0	0	0	0	0	0	0	0	0	77	0.4	0.04	0.2	0	0.12	0.04	0.04	0.84	0.2	0.48
GeoB	10038	-5.9365	103.246	1891	17.08.09	04:22:00	200	500	75	14	3	11	0	9	4	1	35	5	20	9	0	2	5	4	0	8	26	0	0	0	0	0	0	0	0	0	0	0	156	0.186667	0.04	0.146667	0	0.12	0.0533333	0.0133333	0.466667	0.0666667	0.266667
GeoB	10039	-5.9365	103.246	1797	17.08.05	06:37:00	0	25	6.25	4	2	5	2	0	1	0	4	2	4	2	0	0	0	0	0	0	0	0	0	0	0	0	0	0	0	0	0	0	26	0.64	0.32	0.8	0.32	0	0.16	0	0.64	0.32	0.64
GeoB	10039	-5.867	103.294	1798	17.08.06	07:37:00	25	50	6.25	6	4	3	0	1	1	1	7	8	0	1	0	0	1	0	0	1	0	1	0	0	1	0	0	0	0	0	0	1	37	0.96	0.64	0.48	0	0.16	0.16	0.16	1.12	1.28	0
GeoB	10039	-5.867	103.294	1799	17.08.07	08:37:00	50	100	12.5	0	1	1	0	0	3	0	3	1	3	3	0	0	1	0	0	0	0	0	0	0	1	1	0	0	0	0	0	0	18	0	0.08	0.08	0	0	0.24	0	0.24	0.08	0.24
GeoB	10039	-5.867	103.294	1800	17.08.08	09:37:00	100	200	25	0	0	4	1	0	2	0	8	4	8	0	1	0	0	0	0	1	13	0	0	0	0	4	0	0	0	0	0	0	46	0	0	0.16	0.04	0	0.08	0	0.32	0.16	0.32
GeoB	10039	-5.867	103.294	1801	17.08.09	10:37:00	200	500	75	1	0	0	0	0	0	0	8	4	5	0	0	0	1	0	0	1	3	0	0	0	0	2	0	0	0	0	0	0	25	0.0133333	0	0	0	0	0	0	0.106667	0.0533333	0.0666667
GeoB	10040	-5.867	103.294	2602	18.08.05	01:59:00	0	25	6.25	22	1	14	0	0	9	0	18	24	24	8	0	0	3	0	0	1	0	11	0	0	0	0	0	0	0	0	0	0	135	3.52	0.16	2.24	0	0	1.44	0	2.88	3.84	3.84
GeoB	10040	-6.4748	102.856	2603	18.08.06	02:59:00	25	50	6.25	23	5	3	2	3	25	2	9	10	11	3	0	0	6	0	0	2	0	3	0	0	0	0	0	0	0	0	0	2	109	3.68	0.8	0.48	0.32	0.48	4	0.32	1.44	1.6	1.76
GeoB	10040	-6.4748	102.856	2604	18.08.07	03:59:00	50	100	12.5	11	5	5	1	7	23	16	2	6	14	3	0	0	3	1	0	1	0	0	0	0	0	2	0	0	0	0	0	1	101	0.88	0.4	0.4	0.08	0.56	1.84	1.28	0.16	0.48	1.12
GeoB	10040	-6.4748	102.856	2605	18.08.08	04:59:00	100	200	25	0	0	0	0	0	0	0	0	0	0	0	0	0	0	0	0	0	0	0	0	0	0	0	0	0	0	0	0	0	0	0	0	0	0	0	0	0	0	0	0
GeoB	10040	-6.4748	102.856	2606	18.08.09	05:59:00	200	500	75	9	6	15	0	4	2	6	24	15	17	5	0	0	1	1	0	0	8	4	0	0	0	3	1	0	0	0	0	0	121	0.12	0.08	0.2	0	0.0533333	0.0266667	0.08	0.32	0.2	0.226667
GeoB	10041	-6.2737	103.007	1540	18.08.05	10:53:00	0	25	6.25	6	0	2	2	5	6	0	21	6	51	1	0	0	7	0	0	8	0	0	0	0	0	0	0	0	0	0	0	0	115	0.96	0	0.32	0.32	0.8	0.96	0	3.36	0.96	8.16
GeoB	10041	-6.2737	103.007	1541	18.08.06	11:53:00	25	50	6.25	5	3	7	0	4	27	4	22	3	27	0	0	0	8	3	0	3	0	5	0	0	0	0	0	0	0	0	0	0	121	0.8	0.48	1.12	0	0.64	4.32	0.64	3.52	0.48	4.32
GeoB	10041	-6.2737	103.007	1542	18.08.07	12:53:00	50	100	12.5	8	1	1	0	3	4	1	25	5	4	0	0	0	0	0	0	0	0	1	0	0	0	0	0	0	0	0	0	0	53	0.64	0.08	0.08	0	0.24	0.32	0.08	2	0.4	0.32
GeoB	10041	-6.2737	103.007	1543	18.08.08	13:53:00	100	200	25	0	0	0	0	0	0	0	0	0	0	0	0	0	0	0	0	0	0	0	0	0	0	0	0	0	0	0	0	0	0	0	0	0	0	0	0	0	0	0	0
GeoB	10041	-6.2737	103.007	1544	18.08.09	14:53:00	200	500	75	16	4	7	3	3	13	3	124	23	34	6	0	0	5	5	0	1	14	16	0	0	6	6	1	0	0	0	0	3	293	0.213333	0.0533333	0.0933333	0.04	0.04	0.173333	0.04	1.65333	0.306667	0.453333
GeoB	10044	-8.0552	109.015	3358	22.08.05	08:12:00	0	25	6.25	4	0	4	0	0	1	0	5	7	6	1	0	1	0	2	0	0	0	1	0	0	0	3	0	0	0	0	0	0	35	0.64	0	0.64	0	0	0.16	0	0.8	1.12	0.96
GeoB	10044	-8.0552	109.015	3359	22.08.06	09:12:00	25	50	6.25	1	1	5	0	4	8	0	0	6	1	0	0	1	0	0	0	0	0	2	0	0	0	0	0	0	0	0	0	0	29	0.16	0.16	0.8	0	0.64	1.28	0	0	0.96	0.16
GeoB	10044	-8.0552	109.015	3360	22.08.07	10:12:00	50	100	12.5	1	1	5	2	10	16	5	5	9	5	0	0	0	0	1	0	0	4	0	0	0	0	0	0	0	0	0	0	0	64	0.08	0.08	0.4	0.16	0.8	1.28	0.4	0.4	0.72	0.4
GeoB	10044	-8.0552	109.015	3361	22.08.08	11:12:00	100	200	25	0	0	0	0	0	29	1	2	12	3	0	0	0	1	0	0	0	11	2	0	0	0	0	3	0	0	0	0	2	66	0	0	0	0	0	1.16	0.04	0.08	0.48	0.12
GeoB	10044	-8.0552	109.015	3362	22.08.09	12:12:00	200	500	75	3	0	7	0	5	16	0	6	29	9	3	0	1	0	0	0	1	4	0	0	0	0	0	1	0	0	0	0	0	85	0.04	0	0.0933333	0	0.0666667	0.213333	0	0.08	0.386667	0.12
GeoB	10045	-8.7432	109.02	3571	23.08.05	04:27:00	0	25	6.25	4	0	15	0	5	16	4	1	9	9	0	0	0	2	0	0	0	2	0	0	0	0	0	0	0	0	0	0	0	67	0.64	0	2.4	0	0.8	2.56	0.64	0.16	1.44	1.44
GeoB	10045	-8.7432	109.02	3572	23.08.06	05:27:00	25	50	6.25	3	0	0	0	0	0	0	0	0	0	0	0	0	0	0	0	0	0	0	0	0	0	0	0	0	0	0	0	0	3	0.48	0	0	0	0	0	0	0	0	0
GeoB	10045	-8.7432	109.02	3573	23.08.07	06:27:00	50	100	12.5	1	1	11	4	12	55	8	3	5	6	2	0	1	1	0	0	0	10	0	2	0	0	1	1	0	0	0	0	0	124	0.08	0.08	0.88	0.32	0.96	4.4	0.64	0.24	0.4	0.48
GeoB	10045	-8.7432	109.02	3574	23.08.08	07:27:00	100	200	25	1	0	4	0	2	11	0	1	6	6	0	0	0	1	0	0	0	6	0	1	0	0	0	0	0	0	0	0	0	39	0.04	0	0.16	0	0.08	0.44	0	0.04	0.24	0.24
GeoB	10045	-8.7432	109.02	3575	23.08.09	08:27:00	200	500	75	6	6	15	0	7	18	5	6	36	14	4	0	0	5	7	0	2	6	1	3	0	0	1	4	0	0	0	0	0	146	0.08	0.08	0.2	0	0.0933333	0.24	0.0666667	0.08	0.48	0.186667
GeoB	10046	-9.6043	109.063	2604	24.08.05	02:30:00	0	25	6.25	4	0	2	0	8	7	0	1	19	10	0	0	0	1	0	0	0	0	0	0	0	0	0	0	0	0	0	0	0	52	0.64	0	0.32	0	1.28	1.12	0	0.16	3.04	1.6
GeoB	10046	-9.6043	109.063	2605	24.08.06	03:30:00	25	50	6.25	0	0	0	0	0	0	0	0	15	2	0	0	0	0	0	0	0	0	0	0	0	0	0	0	0	0	0	0	0	17	0	0	0	0	0	0	0	0	2.4	0.32
GeoB	10046	-9.6043	109.063	2606	24.08.07	04:30:00	50	100	12.5	5	0	19	6	36	105	27	11	30	46	0	0	0	4	1	0	0	0	1	1	0	0	0	4	0	1	0	0	0	297	0.4	0	1.52	0.48	2.88	8.4	2.16	0.88	2.4	3.68
GeoB	10046	-9.6043	109.063	2607	24.08.08	05:30:00	100	200	25	4	3	19	14	17	76	15	32	56	40	0	0	0	3	0	0	0	9	7	9	0	0	0	3	0	0	0	0	1	308	0.16	0.12	0.76	0.56	0.68	3.04	0.6	1.28	2.24	1.6
GeoB	10046	-9.6043	109.063	2608	24.08.09	06:30:00	200	500	75	9	4	10	10	20	8	12	47	58	25	7	0	0	7	3	0	3	14	7	2	0	0	5	10	0	0	0	0	0	261	0.12	0.0533333	0.133333	0.133333	0.266667	0.106667	0.16	0.626667	0.773333	0.333333
GeoB	10048	-8.255	108.147	3060	25.08.05	03:01:00	0	25	6.25	2	1	30	7	2	27	0	13	21	14	3	0	0	2	0	0	0	24	2	27	0	0	2	3	0	0	0	0	0	180	0.32	0.16	4.8	1.12	0.32	4.32	0	2.08	3.36	2.24
GeoB	10048	-8.255	108.147	3061	25.08.06	04:01:00	25	50	6.25	5	6	42	9	16	12	1	52	38	13	6	0	0	2	6	4	3	7	17	4	0	0	7	15	0	0	1	0	0	266	0.8	0.96	6.72	1.44	2.56	1.92	0.16	8.32	6.08	2.08
GeoB	10048	-8.255	108.147	3062	25.08.07	05:01:00	50	100	12.5	1	0	4	0	2	21	2	0	5	7	0	0	0	3	1	0	1	9	0	0	0	0	0	0	0	1	0	0	0	57	0.08	0	0.32	0	0.16	1.68	0.16	0	0.4	0.56
GeoB	10048	-8.255	108.147	3063	25.08.08	06:01:00	100	200	25	4	1	11	2	4	10	4	0	11	3	0	0	0	0	0	0	1	0	0	0	0	0	0	0	0	0	0	0	0	51	0.16	0.04	0.44	0.08	0.16	0.4	0.16	0	0.44	0.12
GeoB	10048	-8.255	108.147	3064	25.08.09	07:01:00	200	500	75	2	1	15	1	0	8	1	2	6	2	0	0	0	1	1	0	1	0	1	0	0	0	0	0	0	0	0	0	0	42	0.0266667	0.0133333	0.2	0.0133333	0	0.106667	0.0133333	0.0266667	0.08	0.0266667
GeoB	10049	-8.7852	110.496	1291	26.08.05	12:11:00	0	25	6.25	3	0	2	0	0	1	2	4	31	2	0	0	0	0	1	0	0	0	1	0	0	0	0	0	0	0	0	0	0	47	0.48	0	0.32	0	0	0.16	0.32	0.64	4.96	0.32
GeoB	10049	-8.7852	110.496	1292	26.08.06	13:11:00	25	50	6.25	2	0	1	0	15	0	14	10	7	6	0	0	0	1	5	0	0	0	0	0	0	0	0	0	0	0	0	0	0	61	0.32	0	0.16	0	2.4	0	2.24	1.6	1.12	0.96
GeoB	10049	-8.7852	110.496	1293	26.08.07	14:11:00	50	100	12.5	0	0	2	1	0	1	0	0	0	0	0	0	0	0	0	0	0	0	0	1	0	0	0	0	0	0	0	0	0	5	0	0	0.16	0.08	0	0.08	0	0	0	0
GeoB	10049	-8.7852	110.496	1294	26.08.08	15:11:00	100	200	25	2	1	5	1	2	4	5	17	27	28	0	0	0	0	5	0	0	7	6	0	0	0	0	1	0	0	0	1	2	114	0.08	0.04	0.2	0.04	0.08	0.16	0.2	0.68	1.08	1.12
GeoB	10049	-8.7852	110.496	1295	26.08.09	16:11:00	200	500	75	10	0	20	3	15	7	9	62	40	63	0	0	0	0	9	1	12	13	9	1	0	0	1	11	0	0	0	0	0	286	0.133333	0	0.266667	0.04	0.2	0.0933333	0.12	0.826667	0.533333	0.84
GeoB	10051	-9.2932	110.497	2391	27.08.05	08:42:00	0	25	6.25	3	0	1	0	0	0	0	2	12	0	0	0	0	0	0	0	0	0	0	0	0	0	0	0	0	0	0	0	0	18	0.48	0	0.16	0	0	0	0	0.32	1.92	0
GeoB	10051	-9.2932	110.497	2392	27.08.06	09:42:00	25	50	6.25	2	1	7	0	0	2	1	0	4	10	2	0	0	1	0	0	0	1	1	0	0	1	0	0	0	0	0	0	0	33	0.32	0.16	1.12	0	0	0.32	0.16	0	0.64	1.6
GeoB	10051	-9.2932	110.497	2393	27.08.07	10:42:00	50	100	12.5	4	3	22	14	15	110	20	16	25	24	5	0	0	0	6	1	0	7	3	0	0	1	0	1	0	0	0	0	0	277	0.32	0.24	1.76	1.12	1.2	8.8	1.6	1.28	2	1.92
GeoB	10051	-9.2932	110.497	2394	27.08.08	11:42:00	100	200	25	5	0	20	2	0	17	12	5	32	21	1	0	0	1	5	1	0	12	2	2	0	2	0	1	0	0	0	0	0	141	0.2	0	0.8	0.08	0	0.68	0.48	0.2	1.28	0.84
GeoB	10051	-9.2932	110.497	2395	27.08.09	12:42:00	200	500	75	15	2	69	7	8	11	12	59	93	109	7	0	0	0	14	2	0	9	9	3	0	0	11	16	0	0	0	0	0	456	0.2	0.0266667	0.92	0.0933333	0.106667	0.146667	0.16	0.786667	1.24	1.45333
GeoB	10052	-8.6938	110.634	1000	28.08.05	08:28:00	0	25	6.25	1	0	1	0	0	0	0	1	5	0	0	0	0	0	0	0	0	0	0	1	0	0	0	0	0	0	0	1	0	10	0.16	0	0.16	0	0	0	0	0.16	0.8	0
GeoB	10052	-8.6938	110.634	1001	28.08.06	09:28:00	25	50	6.25	0	0	0	0	0	0	0	0	0	0	0	0	0	0	0	0	0	0	0	0	0	0	0	0	0	0	0	0	0	0	0	0	0	0	0	0	0	0	0	0
GeoB	10052	-8.6938	110.634	1002	28.08.07	10:28:00	50	100	12.5	4	2	14	4	14	42	30	11	33	23	21	0	0	10	6	0	0	7	1	0	0	1	0	0	0	0	0	0	0	223	0.32	0.16	1.12	0.32	1.12	3.36	2.4	0.88	2.64	1.84
GeoB	10052	-8.6938	110.634	1003	28.08.08	11:28:00	100	200	25	3	1	7	1	0	20	3	22	38	17	8	0	0	6	3	0	0	11	12	0	0	0	0	4	0	0	0	1	0	157	0.12	0.04	0.28	0.04	0	0.8	0.12	0.88	1.52	0.68
GeoB	10052	-8.6938	110.634	1004	28.08.09	12:28:00	200	500	75	17	7	17	4	14	2	9	69	25	24	45	0	1	13	11	0	3	6	0	0	0	0	0	2	0	0	0	0	0	269	0.226667	0.0933333	0.226667	0.0533333	0.186667	0.0266667	0.12	0.92	0.333333	0.32
GeoB	10053	-8.6765	112.872	1378	29.08.05	06:07:00	0	25	6.25	0	0	0	0	0	0	0	0	0	0	0	0	0	0	0	0	0	0	0	0	0	0	0	0	0	0	0	0	0	0	0	0	0	0	0	0	0	0	0	0
GeoB	10053	-8.6765	112.872	1379	29.08.06	07:07:00	25	50	6.25	5	1	10	4	1	8	1	4	13	12	2	0	0	3	7	0	0	0	1	0	0	0	0	0	0	0	0	0	0	72	0.8	0.16	1.6	0.64	0.16	1.28	0.16	0.64	2.08	1.92
GeoB	10053	-8.6765	112.872	1380	29.08.07	08:07:00	50	100	12.5	1	0	0	0	7	23	5	14	27	13	6	0	0	4	3	1	0	15	4	0	0	0	0	1	0	0	0	0	2	126	0.08	0	0	0	0.56	1.84	0.4	1.12	2.16	1.04
GeoB	10053	-8.6765	112.872	1381	29.08.08	09:07:00	100	200	25	1	0	8	2	2	11	4	122	38	25	5	0	0	0	0	0	0	17	0	0	0	4	2	3	0	0	0	0	0	244	0.04	0	0.32	0.08	0.08	0.44	0.16	4.88	1.52	1
GeoB	10053	-8.6765	112.872	1382	29.08.09	10:07:00	200	500	75	15	5	5	0	4	10	15	103	49	21	2	0	0	1	0	0	2	17	0	1	0	2	2	7	0	0	0	0	0	261	0.2	0.0666667	0.0666667	0	0.0533333	0.133333	0.2	1.37333	0.653333	0.28
GeoB	10055	-9.248	113.05	2615	30.08.05	03:36:00	0	25	6.25	2	0	1	0	0	0	0	0	1	0	0	0	0	0	0	0	0	0	0	0	0	0	0	0	0	0	0	0	0	4	0.32	0	0.16	0	0	0	0	0	0.16	0
GeoB	10055	-9.248	113.05	2616	30.08.06	04:36:00	25	50	6.25	1	0	2	0	5	1	5	1	6	11	2	0	0	0	0	0	1	1	1	0	0	0	0	0	0	0	0	0	0	37	0.16	0	0.32	0	0.8	0.16	0.8	0.16	0.96	1.76
GeoB	10055	-9.248	113.05	2617	30.08.07	05:36:00	50	100	12.5	0	0	4	0	1	5	15	5	26	16	5	0	0	0	1	0	0	5	1	0	0	0	0	1	0	0	0	0	0	85	0	0	0.32	0	0.08	0.4	1.2	0.4	2.08	1.28
GeoB	10055	-9.248	113.05	2618	30.08.08	06:36:00	100	200	25	2	2	8	1	3	7	4	74	48	29	4	0	0	14	9	2	3	27	24	0	0	2	0	5	0	0	1	0	0	269	0.08	0.08	0.32	0.04	0.12	0.28	0.16	2.96	1.92	1.16
GeoB	10055	-9.248	113.05	2619	30.08.09	07:36:00	200	500	75	7	1	15	1	20	1	3	49	57	36	10	0	1	1	2	13	5	5	9	0	0	0	0	4	0	0	0	0	0	240	0.0933333	0.0133333	0.2	0.0133333	0.266667	0.0133333	0.04	0.653333	0.76	0.48
GeoB	10057	-9.8215	113.107	1615	31.08.05	05:34:00	0	25	6.25	1	0	4	0	1	0	0	9	22	4	0	0	0	0	0	0	0	0	0	0	0	0	0	0	0	0	0	0	0	41	0.16	0	0.64	0	0.16	0	0	1.44	3.52	0.64
GeoB	10057	-9.8215	113.107	1616	31.08.06	06:34:00	25	50	6.25	0	0	3	2	24	0	5	4	9	12	0	0	0	0	5	0	0	0	2	0	0	0	0	0	0	0	0	0	0	66	0	0	0.48	0.32	3.84	0	0.8	0.64	1.44	1.92
GeoB	10057	-9.8215	113.107	1617	31.08.07	07:34:00	50	100	12.5	1	0	4	6	17	0	2	8	4	12	2	0	0	0	9	0	0	1	0	0	0	0	0	0	0	0	0	0	0	66	0.08	0	0.32	0.48	1.36	0	0.16	0.64	0.32	0.96
GeoB	10057	-9.8215	113.107	1618	31.08.08	08:34:00	100	200	25	0	0	2	0	3	2	1	29	9	9	5	0	0	5	3	0	0	5	5	0	0	17	0	4	0	0	0	0	3	102	0	0	0.08	0	0.12	0.08	0.04	1.16	0.36	0.36
GeoB	10057	-9.8215	113.107	1619	31.08.09	09:34:00	200	500	75	0	0	19	0	14	1	11	294	54	47	4	0	0	3	4	0	0	32	6	0	0	6	0	3	0	0	0	0	0	498	0	0	0.253333	0	0.186667	0.0133333	0.146667	3.92	0.72	0.626667
GeoB	10061	-9.7288	113.024	2174	02.09.05	00:30:00	0	25	6.25	0	0	1	0	1	0	0	0	0	1	0	0	0	0	0	0	0	0	0	0	0	0	0	0	0	0	0	0	0	3	0	0	0.16	0	0.16	0	0	0	0	0.16
GeoB	10061	-9.7288	113.024	2175	02.09.06	01:30:00	25	50	6.25	3	0	2	0	15	0	3	4	9	5	0	0	0	0	0	0	0	1	0	0	0	0	0	0	0	0	0	0	0	42	0.48	0	0.32	0	2.4	0	0.48	0.64	1.44	0.8
GeoB	10061	-9.7288	113.024	2176	02.09.07	02:30:00	50	100	12.5	21	0	3	2	16	0	18	106	26	23	0	0	0	0	11	0	0	12	25	0	0	0	0	1	0	0	0	0	0	264	1.68	0	0.24	0.16	1.28	0	1.44	8.48	2.08	1.84
GeoB	10061	-9.7288	113.024	2177	02.09.08	03:30:00	100	200	25	22	1	15	1	6	0	5	145	18	30	1	0	0	4	6	0	0	37	19	0	0	3	0	2	0	0	0	0	1	316	0.88	0.04	0.6	0.04	0.24	0	0.2	5.8	0.72	1.2
GeoB	10061	-9.7288	113.024	2178	02.09.09	04:30:00	200	500	75	24	3	25	10	127	0	7	176	55	97	3	0	0	12	6	0	1	26	25	0	0	14	2	16	0	0	0	0	0	629	0.32	0.04	0.333333	0.133333	1.69333	0	0.0933333	2.34667	0.733333	1.29333
GeoB	10062	-11.1663	115.999	5851	03.09.05	03:11:00	0	25	6.25	14	0	9	0	22	2	2	12	4	38	3	0	0	2	0	0	0	1	8	0	0	0	0	2	0	0	0	0	0	119	2.24	0	1.44	0	3.52	0.32	0.32	1.92	0.64	6.08
GeoB	10062	-11.1663	115.999	5852	03.09.06	04:11:00	25	50	6.25	1	1	0	0	3	1	0	2	0	0	0	0	0	0	0	0	0	1	0	0	0	0	0	0	0	0	0	0	0	9	0.16	0.16	0	0	0.48	0.16	0	0.32	0	0
GeoB	10062	-11.1663	115.999	5853	03.09.07	05:11:00	50	100	12.5	1	0	3	0	2	2	1	6	0	7	1	0	0	0	0	0	0	0	1	0	0	0	0	1	0	0	0	0	0	25	0.08	0	0.24	0	0.16	0.16	0.08	0.48	0	0.56
GeoB	10062	-11.1663	115.999	5854	03.09.08	06:11:00	100	200	25	3	0	4	2	0	1	0	10	4	8	0	0	0	0	5	0	0	3	2	0	0	1	0	1	0	0	0	0	0	44	0.12	0	0.16	0.08	0	0.04	0	0.4	0.16	0.32
GeoB	10062	-11.1663	115.999	5855	03.09.09	07:11:00	200	500	75	5	0	6	3	11	2	0	3	0	10	10	0	0	4	4	2	0	4	3	0	0	0	0	0	0	0	0	0	0	67	0.0666667	0	0.08	0.04	0.146667	0.0266667	0	0.04	0	0.133333
GeoB	10063	-9.6457	118.149	2498	04.09.05	00:31:00	0	25	6.25	1	0	0	0	1	0	0	0	0	1	0	0	0	0	0	0	0	0	0	0	0	0	0	0	0	0	0	0	0	3	0.16	0	0	0	0.16	0	0	0	0	0.16
GeoB	10063	-9.6457	118.149	2499	04.09.06	01:31:00	25	50	6.25	4	0	6	6	3	1	0	4	2	4	4	0	0	1	1	0	0	0	3	0	0	0	1	0	0	0	0	0	0	40	0.64	0	0.96	0.96	0.48	0.16	0	0.64	0.32	0.64
GeoB	10063	-9.6457	118.149	2500	04.09.07	02:31:00	50	100	12.5	3	0	8	0	3	2	0	11	3	3	0	0	0	2	1	1	0	0	2	0	0	0	0	2	0	0	0	0	0	41	0.24	0	0.64	0	0.24	0.16	0	0.88	0.24	0.24
GeoB	10063	-9.6457	118.149	2501	04.09.08	03:31:00	100	200	25	0	0	0	0	0	0	0	0	0	0	0	0	0	0	0	0	0	0	0	0	0	0	0	0	0	0	0	0	0	0	0	0	0	0	0	0	0	0	0	0
GeoB	10063	-9.6457	118.149	2502	04.09.09	04:31:00	200	500	75	12	0	13	0	23	0	2	39	17	2	2	0	0	10	2	0	0	17	13	0	0	3	1	4	0	0	0	0	7	167	0.16	0	0.173333	0	0.306667	0	0.0266667	0.52	0.226667	0.0266667
GeoB	10064	-9.5387	118.304	2033	04.09.05	09:26:00	0	25	6.25	11	0	15	2	0	0	0	3	3	3	0	0	0	0	0	0	0	0	0	0	0	1	0	0	0	0	0	0	0	38	1.76	0	2.4	0.32	0	0	0	0.48	0.48	0.48
GeoB	10064	-9.5387	118.304	2034	04.09.06	10:26:00	25	50	6.25	2	0	1	0	1	0	1	1	1	4	0	0	0	0	0	0	0	0	0	0	0	0	0	0	0	0	0	0	0	11	0.32	0	0.16	0	0.16	0	0.16	0.16	0.16	0.64
GeoB	10064	-9.5387	118.304	2035	04.09.07	11:26:00	50	100	12.5	5	1	8	0	3	0	4	10	7	11	5	0	0	2	4	1	0	4	2	0	0	0	0	0	0	0	0	0	0	67	0.4	0.08	0.64	0	0.24	0	0.32	0.8	0.56	0.88
GeoB	10064	-9.5387	118.304	2036	04.09.08	12:26:00	100	200	25	14	0	7	1	3	0	1	17	9	3	0	0	0	1	0	0	0	4	8	0	0	1	2	2	0	0	0	0	0	73	0.56	0	0.28	0.04	0.12	0	0.04	0.68	0.36	0.12
GeoB	10064	-9.5387	118.304	2037	04.09.09	13:26:00	200	500	75	9	0	32	9	1	0	0	72	15	15	1	0	0	5	2	1	0	9	11	0	0	0	0	0	0	0	0	0	0	182	0.12	0	0.426667	0.12	0.0133333	0	0	0.96	0.2	0.2
GeoB	10065	-9.2227	118.894	1286	05.09.05	00:06:00	0	25	6.25	0	0	0	0	0	0	0	0	0	0	0	0	0	0	0	0	0	0	0	0	0	0	0	0	0	0	0	0	0	0	0	0	0	0	0	0	0	0	0	0
GeoB	10065	-9.2227	118.894	1287	05.09.06	01:06:00	25	50	6.25	0	0	0	0	0	0	0	0	0	0	0	0	0	0	0	0	0	0	0	0	0	0	0	0	0	0	0	0	0	0	0	0	0	0	0	0	0	0	0	0
GeoB	10065	-9.2227	118.894	1288	05.09.07	02:06:00	50	100	12.5	3	0	6	0	3	0	7	3	3	6	1	0	0	0	4	0	0	3	0	0	0	0	0	0	0	0	0	0	0	39	0.24	0	0.48	0	0.24	0	0.56	0.24	0.24	0.48
GeoB	10065	-9.2227	118.894	1289	05.09.08	03:06:00	100	200	25	1	0	3	1	0	0	1	11	2	4	3	0	0	0	1	0	0	7	4	0	0	0	0	2	0	0	0	0	0	40	0.04	0	0.12	0.04	0	0	0.04	0.44	0.08	0.16
GeoB	10065	-9.2227	118.894	1290	05.09.09	04:06:00	200	500	75	3	1	9	10	0	0	1	6	7	13	0	0	0	1	2	0	1	8	3	0	0	10	0	3	0	0	0	0	0	78	0.04	0.0133333	0.12	0.133333	0	0	0.0133333	0.08	0.0933333	0.173333
GeoB	10066	-9.3938	118.575	1630	05.09.05	10:16:00	0	25	6.25	3	0	0	0	0	0	0	0	0	0	0	0	0	0	0	0	0	0	0	0	0	0	0	0	0	0	0	0	0	3	0.48	0	0	0	0	0	0	0	0	0
GeoB	10066	-9.3938	118.575	1631	05.09.06	11:16:00	25	50	6.25	11	0	2	0	1	0	0	0	0	0	0	0	0	0	0	0	0	0	0	0	0	0	0	0	0	0	0	0	0	14	1.76	0	0.32	0	0.16	0	0	0	0	0
GeoB	10066	-9.3938	118.575	1632	05.09.07	12:16:00	50	100	12.5	10	0	0	1	19	0	3	2	6	2	0	0	0	0	3	0	0	0	0	0	0	0	0	0	0	0	0	0	0	46	0.8	0	0	0.08	1.52	0	0.24	0.16	0.48	0.16
GeoB	10066	-9.3938	118.575	1633	05.09.08	13:16:00	100	200	25	6	0	9	3	6	0	4	10	10	13	2	0	0	0	5	0	0	4	4	0	0	0	0	2	0	0	0	0	0	78	0.24	0	0.36	0.12	0.24	0	0.16	0.4	0.4	0.52
GeoB	10066	-9.3938	118.575	1634	05.09.09	14:16:00	200	500	75	29	2	21	1	18	2	6	185	34	11	6	0	0	2	2	4	1	10	45	0	0	0	0	4	1	0	0	0	0	384	0.386667	0.0266667	0.28	0.0133333	0.24	0.0266667	0.08	2.46667	0.453333	0.146667
GeoB	10067	-9.1492	119.29	1136	06.09.05	00:35:00	0	25	6.25	8	0	5	0	0	0	0	1	0	6	0	0	0	0	1	0	0	0	0	0	0	0	0	0	0	0	0	0	0	21	1.28	0	0.8	0	0	0	0	0.16	0	0.96
GeoB	10067	-9.1492	119.29	1137	06.09.06	01:35:00	25	50	6.25	19	0	2	0	8	0	1	2	9	2	0	0	0	0	2	0	0	0	0	0	0	0	0	0	0	0	0	0	0	45	3.04	0	0.32	0	1.28	0	0.16	0.32	1.44	0.32
GeoB	10067	-9.1492	119.29	1138	06.09.07	02:35:00	50	100	12.5	10	0	11	6	14	0	8	5	11	20	2	0	0	0	3	0	0	0	0	0	0	0	0	4	0	0	0	0	0	94	0.8	0	0.88	0.48	1.12	0	0.64	0.4	0.88	1.6
GeoB	10067	-9.1492	119.29	1139	06.09.08	03:35:00	100	200	25	19	0	20	0	3	0	8	70	23	23	13	0	0	0	8	0	0	23	24	0	0	2	2	2	0	0	0	0	0	240	0.76	0	0.8	0	0.12	0	0.32	2.8	0.92	0.92
GeoB	10067	-9.1492	119.29	1140	06.09.09	04:35:00	200	500	75	28	0	14	0	4	0	1	13	18	16	7	0	0	1	3	0	0	18	16	0	0	6	3	2	0	0	0	0	1	151	0.373333	0	0.186667	0	0.0533333	0	0.0133333	0.173333	0.24	0.213333
GeoB	10070	-10.3587	121.302	1509	08.09.05	06:12:00	0	25	6.25	0	0	0	0	0	0	0	0	0	0	0	0	0	0	0	0	0	0	0	0	0	0	0	0	0	0	0	0	0	0	0	0	0	0	0	0	0	0	0	0
GeoB	10070	-10.3587	121.302	1510	08.09.06	07:12:00	25	50	6.25	0	0	0	0	0	0	0	0	0	0	0	0	0	0	0	0	0	0	0	0	0	0	0	0	0	0	0	0	0	0	0	0	0	0	0	0	0	0	0	0
GeoB	10070	-10.3587	121.302	1511	08.09.07	08:12:00	50	100	12.5	18	0	6	0	17	0	9	10	12	25	8	0	0	5	2	0	0	0	5	0	0	1	0	2	0	0	0	0	0	120	1.44	0	0.48	0	1.36	0	0.72	0.8	0.96	2
GeoB	10070	-10.3587	121.302	1512	08.09.08	09:12:00	100	200	25	18	0	11	0	1	2	6	10	16	27	5	0	0	5	1	0	0	17	2	0	0	1	0	6	0	0	0	0	0	128	0.72	0	0.44	0	0.04	0.08	0.24	0.4	0.64	1.08
GeoB	10070	-10.3587	121.302	1513	08.09.09	10:12:00	200	500	75	26	0	22	5	28	0	9	34	23	40	21	0	1	5	2	0	0	15	14	0	0	7	0	6	0	0	0	0	0	258	0.346667	0	0.293333	0.0666667	0.373333	0	0.12	0.453333	0.306667	0.533333
[truncated: 20 more columns]
